# Supplementary material for: Renoprotective effects of a novel cMet agonistic antibody on kidney fibrosis
Source: PubMed Central journal article supplement (PMC6749055; doi:10.1038/s41598-019-49756-z), 2019-09-17
Supplement: 41598_2019_49756_MOESM1_ESM.pdf [file 41598_2019_49756_MOESM1_ESM.pdf]

## **Renoprotective effects of a novel cMet agonistic antibody on kidney fibrosis**

Yong Chul Kim<sup>1\*</sup>, Junghun Lee<sup>2\*</sup>, Jung Nam An<sup>3</sup>, Jin Hyuk Kim<sup>3</sup>, Young-Wook Choi<sup>3</sup>, Lili  
Li<sup>3,4</sup>, Sang Ho Kwon<sup>2</sup>, Mi-Young Lee<sup>2</sup>, Boeun Lee<sup>2</sup>, Jae-Gyun Jeong<sup>2</sup>, Seung-Shin Yu<sup>2</sup>, Chun  
Soo Lim<sup>3,4</sup>, Yon Su Kim<sup>5,6</sup>, Sunyoung Kim<sup>2</sup>, Seung Hee Yang<sup>6,7</sup>, Jung Pyo Lee<sup>3,4</sup>.

\*Both authors contributed equally to this work.

### **Author Affiliations**

<sup>1</sup>*Department of Internal Medicine, Seoul National University Hospital, Seoul, Korea.*

<sup>2</sup>*R&D Center for Innovative Medicines, ViroMed Co., Ltd., Seoul, Korea.*

<sup>3</sup>*Department of Internal Medicine, Seoul National University Boramae Medical Center, Seoul, Korea.*

<sup>4</sup>*Department of Internal Medicine, Seoul National University College of Medicine, Seoul, Korea.*

<sup>5</sup>*Department of Medical Science, Seoul National University College of Medicine, Seoul, Korea.*

<sup>6</sup>*Kidney Research Institute, Seoul National University College of Medicine, Seoul, Korea.*

<sup>7</sup>*Seoul National University Biomedical Research Institute, Seoul, Korea.*

### **Correspondence:**

Seung Hee Yang, PhD

Associate Professor

Seoul National University Biomedical Research Institute and Kidney Research Institute, Seoul  
National University

101 Daehak-ro, Jongno-gu, Seoul, 03080, Republic of Korea

E-mail: ysh5794@gmail.com

and

Jung Pyo Lee, MD, PhD

Associate Professor

Department of Internal Medicine, Seoul National University Boramae Medical Center and  
Seoul National University College of Medicine

20 Boramae-ro 5-gil, Dongjak-gu, Seoul 07061, Republic of Korea.

E-mail: nephrolee@gmail.com

**Supplementary Table S1.**

|               | Control     | CKD1        | CKD3       | CKD5        |
|---------------|-------------|-------------|------------|-------------|
| N (27)        | 6           | 9           | 6          | 5           |
| Age           | 24.2 ± 5.9  | 34.8 ± 11.2 | 50.2 ± 8.4 | 50.8 ± 12.4 |
| Sex (male, %) | 4 (66.7)    | 3 (33.4)    | 3 (50.0)   | 3 (60.0)    |
| eGFR          | 102.5 ± 5.0 | 94.2 ± 3.0  | 45.8 ± 4.5 | 11.9 ± 7.3  |

**Supplementary Table S1.** Baseline characteristics of IgA nephropathy patients.

**Supplementary Table S2.**

|                | Ka (1/Ms)          | Kd (1/s)              | KD (M)                 |
|----------------|--------------------|-----------------------|------------------------|
| Mouse cMet-Fc  | $2.58 \times 10^6$ | $1.59 \times 10^{-3}$ | $6.15 \times 10^{-10}$ |
| Human cMet -Fc | $2.71 \times 10^6$ | $8.07 \times 10^{-4}$ | $2.98 \times 10^{-10}$ |

**Supplementary Table. S2. The binding affinity of VM507 to mouse and human cMet.**

**Supplementary Figure S1.**

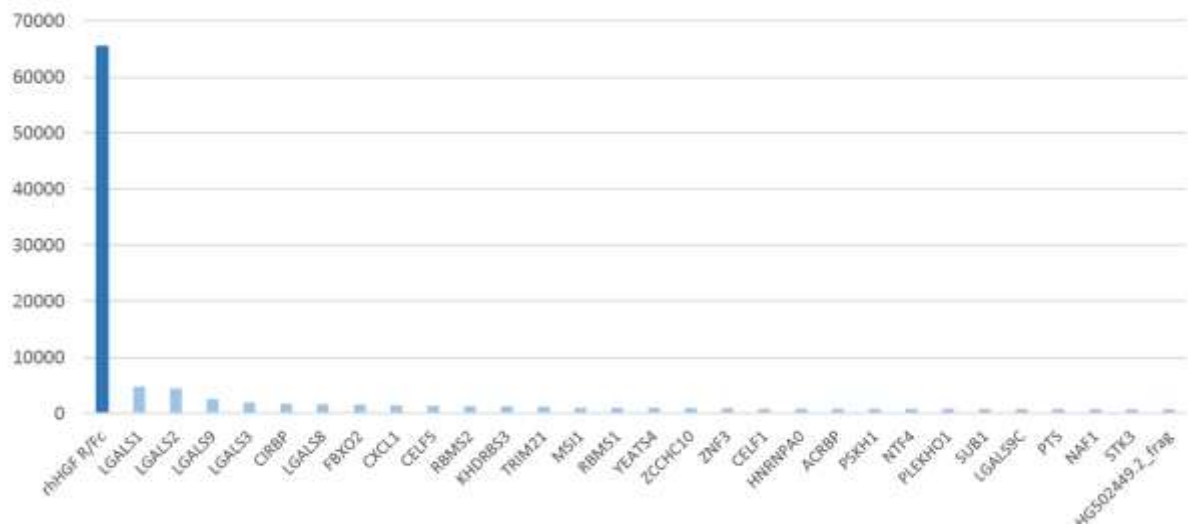

**Supplementary Figure S1. Target specificity of VM507 by microarray test**

Supplementary Figure S2.

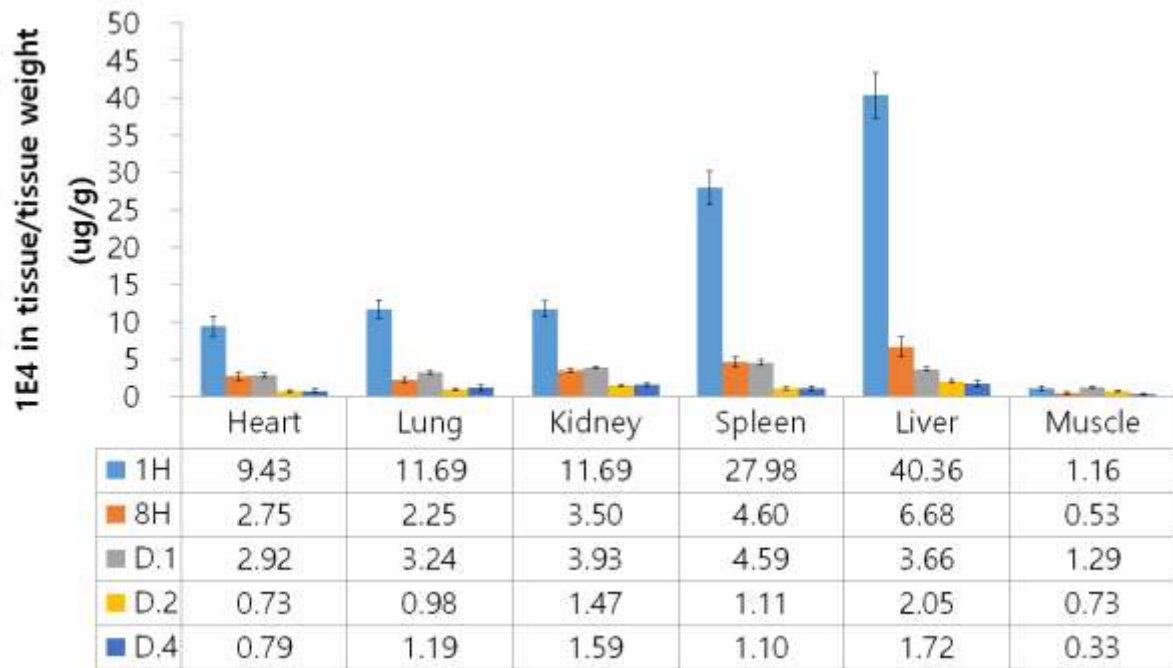

Supplementary Figure S2. In vivo Bio-distribution of VM507

Supplementary Figure S3.

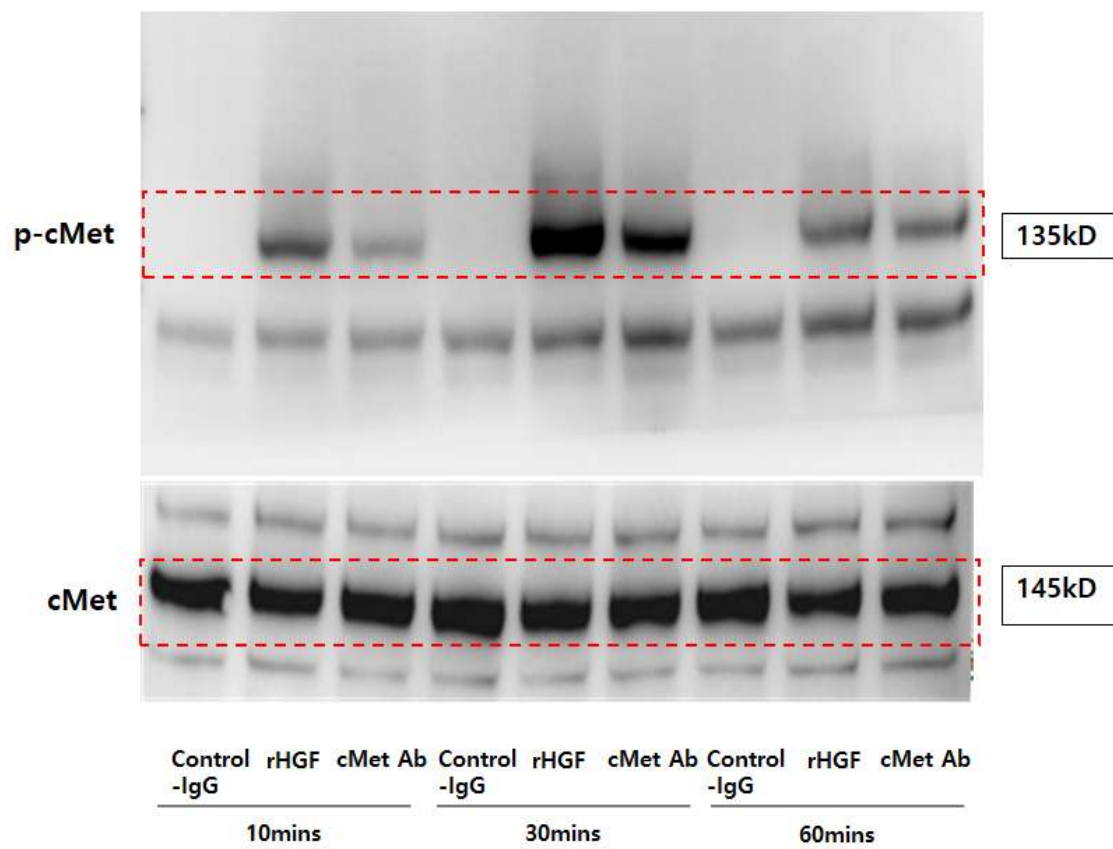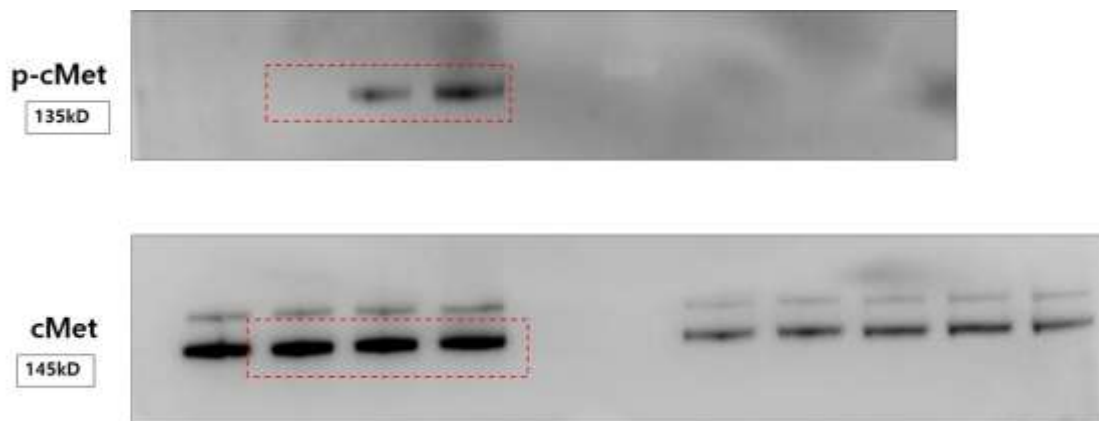

Supplementary Figure S3. Full length blots of Figure 2A & 2E. Red dotted lines show the cropping locations.

Supplementary Figure S4.

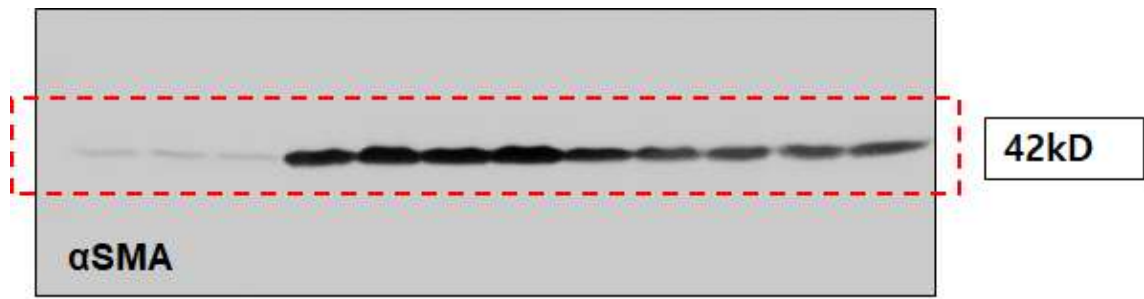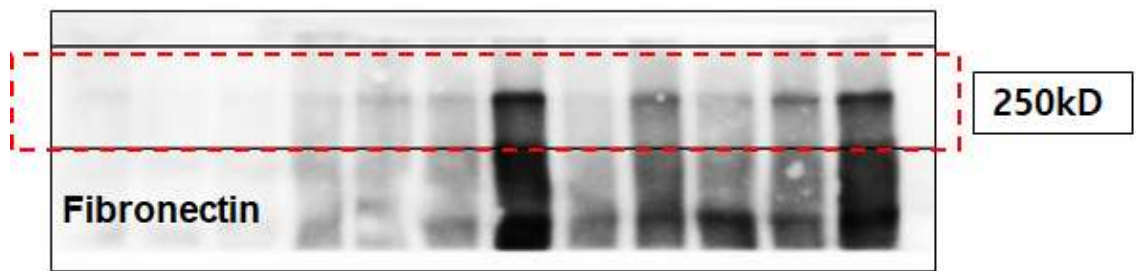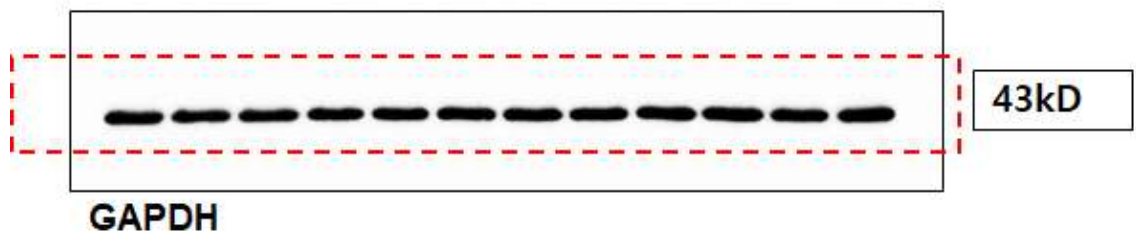



**Collagen 1**

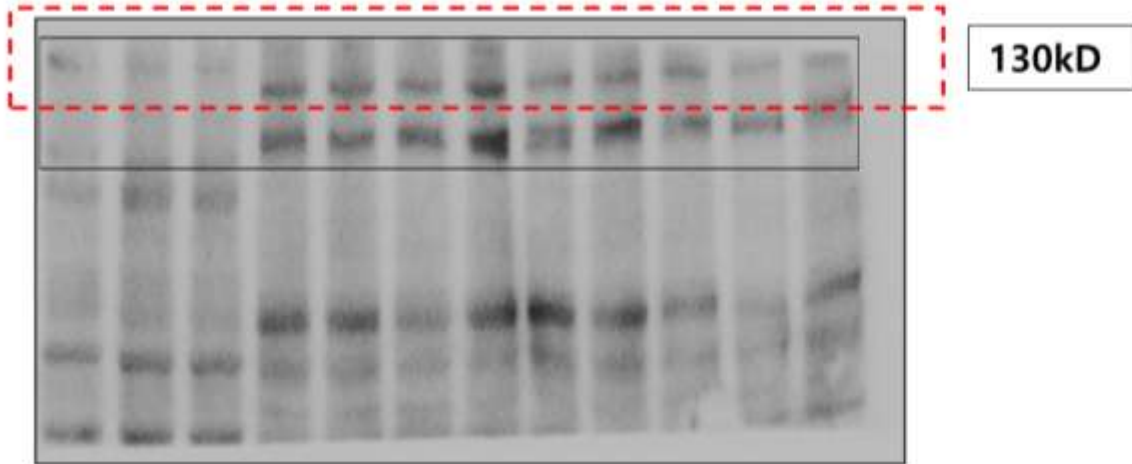

**E-cadherin**

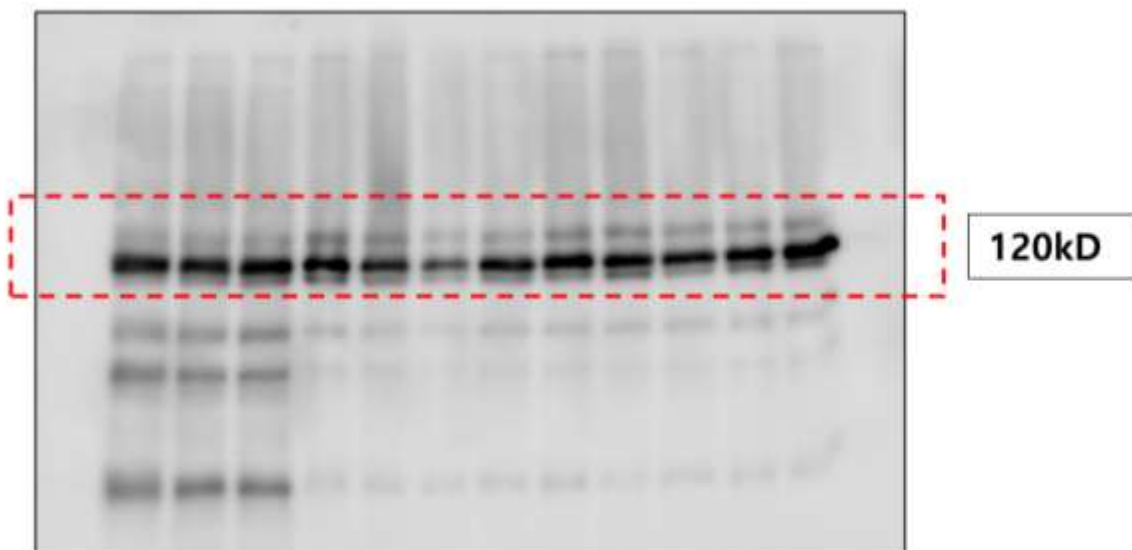

---

**Supplementary Figure S4. Full length blots of Figure 4B.** Red dotted lines show the cropping locations.

Supplementary Figure S5.

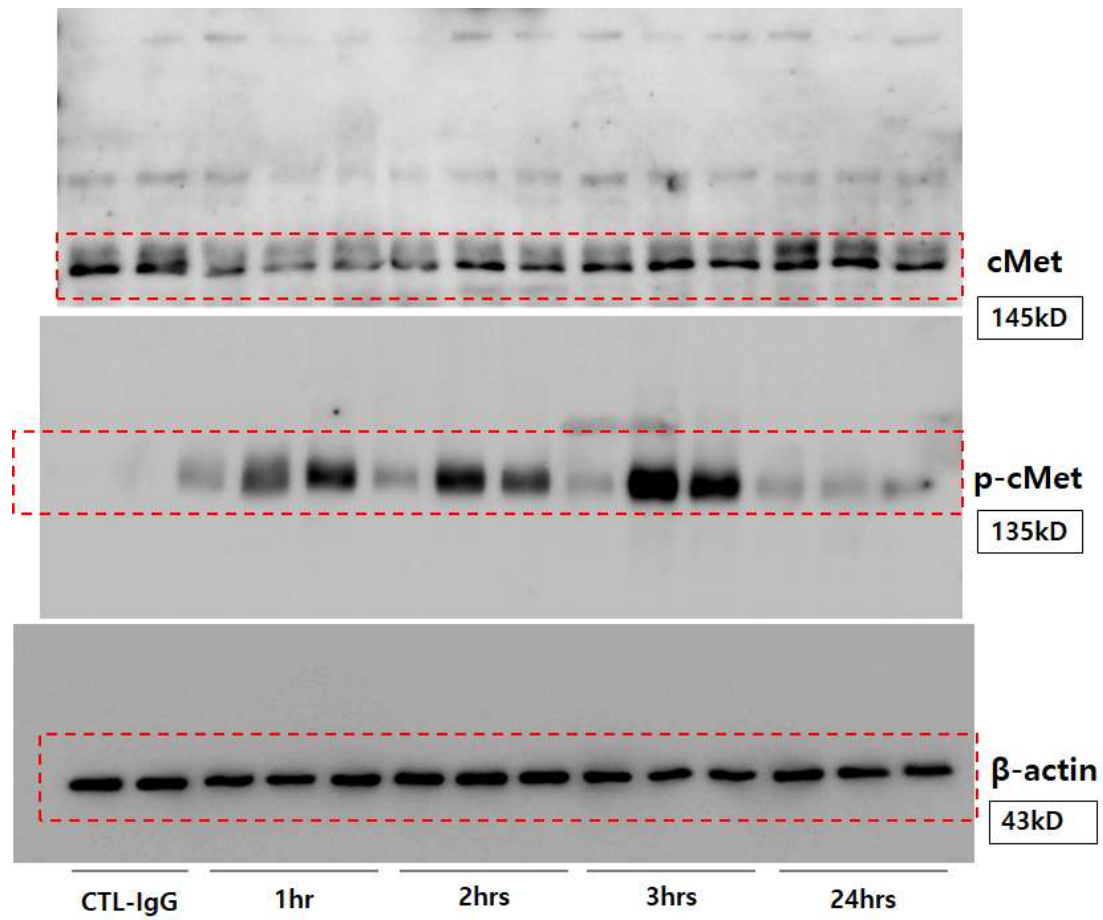

Supplementary Figure S5. Full length blots of Figure 5A. Red dotted lines show the cropping locations.

Supplementary Figure S6.

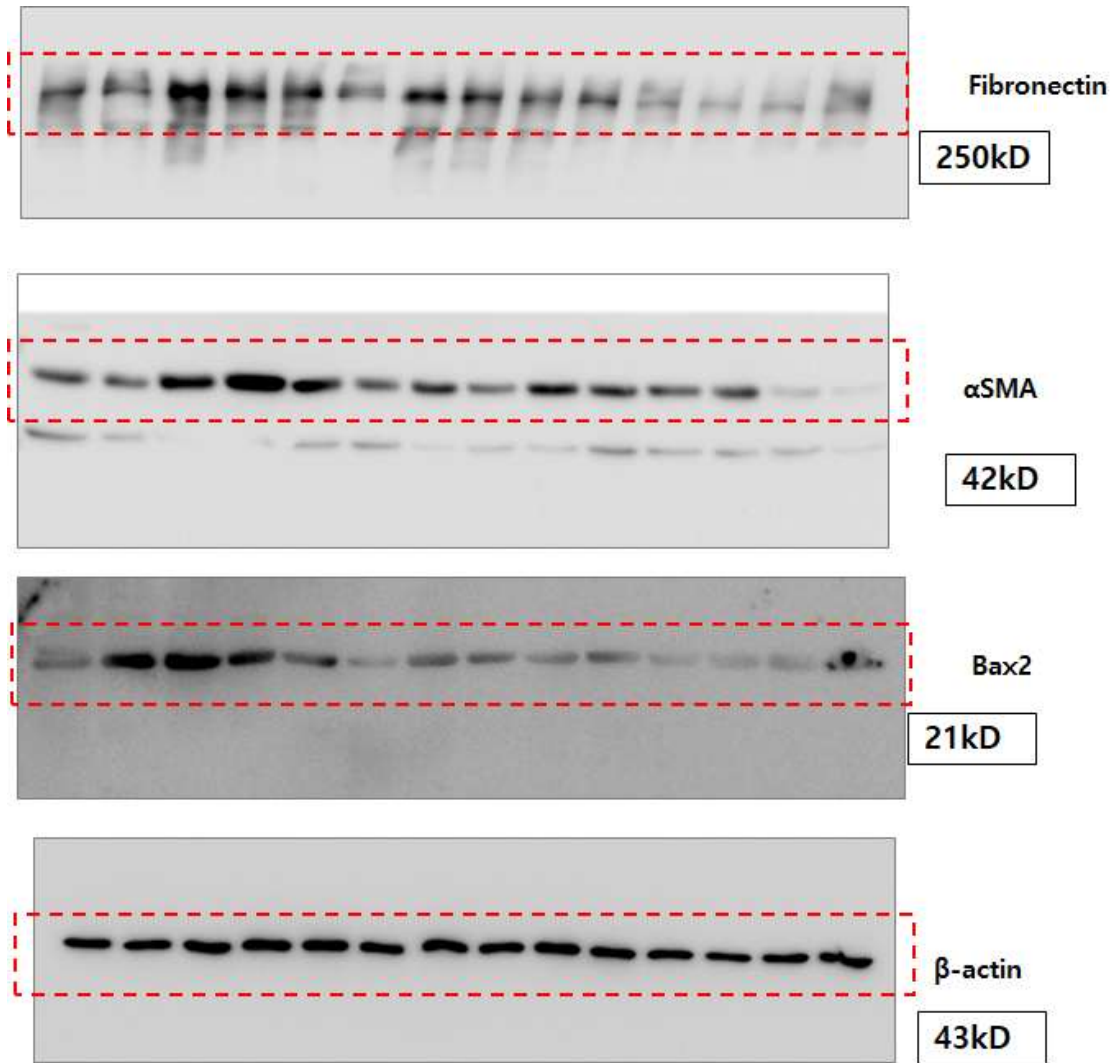

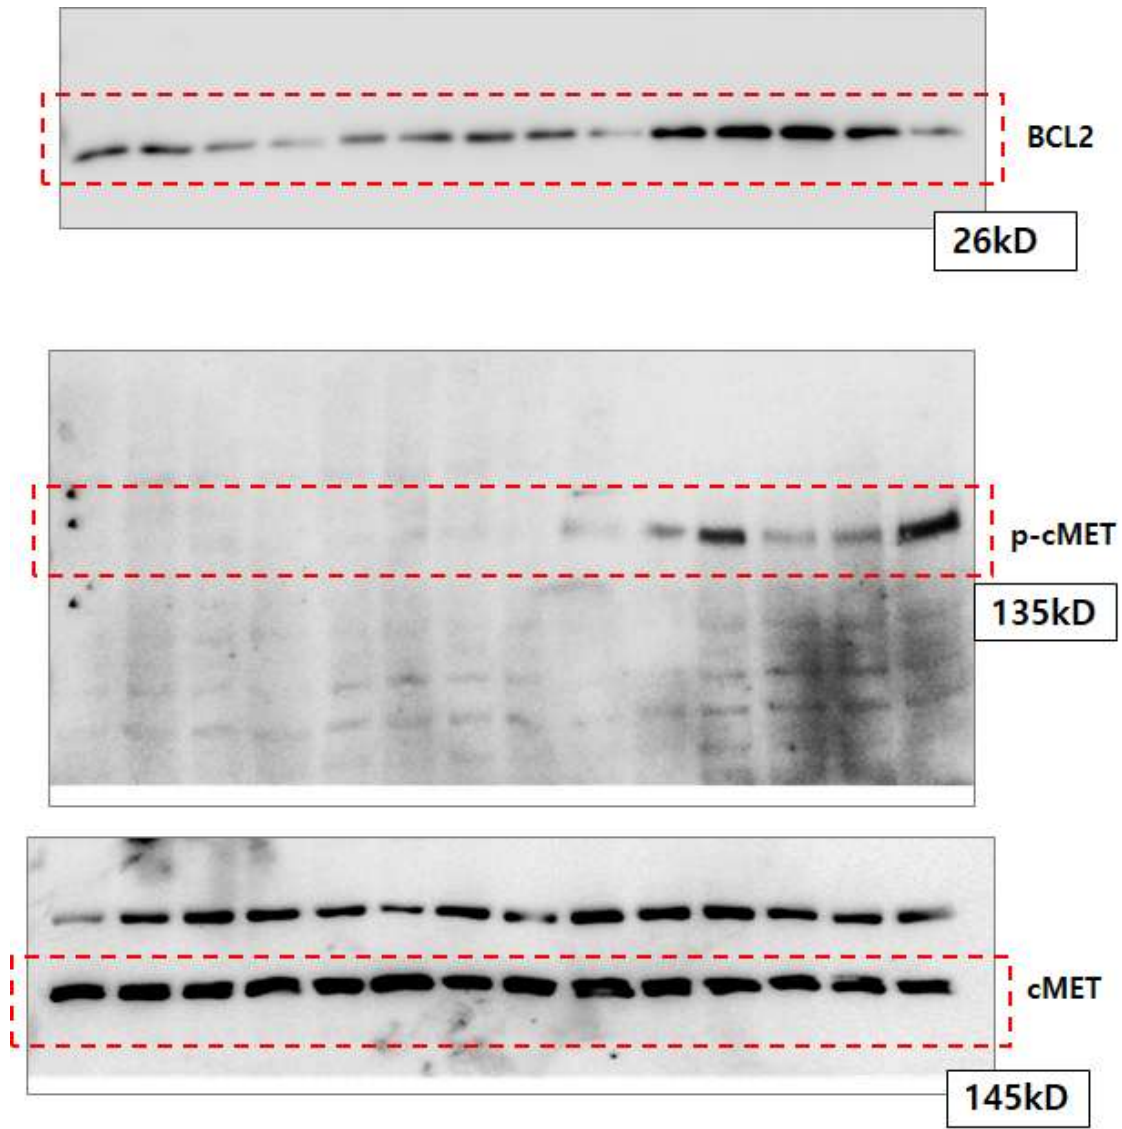

**Supplementary Figure S6. Full length blots of Figure 6B.** Red dotted lines show the cropping locations.
